# Supplementary material for: Promoter-Intrinsic and Local Chromatin Features Determine Gene Repression in LADs
Source: PubMed Central journal article supplement — Cell. 2019 May 2;177(4):852–864.e14. doi: 10.1016/j.cell.2019.03.009 (PMC6506275; doi:10.1016/j.cell.2019.03.009), 2019-05-02
Supplement: mmc1.pdf [file mmc1.pdf]

**Cell, Volume 177**

## **Supplemental Information**

### **Promoter-Intrinsic and Local Chromatin Features**

#### **Determine Gene Repression in LADs**

**Christ Leemans, Marloes C.H. van der Zwalm, Laura Brueckner, Federico Comoglio, Tom van Schaik, Ludo Pagie, Joris van Arensbergen, and Bas van Steensel**

**Table S1. Specifications of promoters used for TRIP experiments. Related to Figure 3.**

| <b>Gene Symbol</b>     | <b>promoter region used</b> | <b>transcript ID</b> | <b>gene ID</b>     | <b>class</b> |
|------------------------|-----------------------------|----------------------|--------------------|--------------|
| <b><i>ADAMTS1</i></b>  | chr21:26845360-26847082     | ENST00000284984.7    | ENSG00000154734.14 | repressed    |
| <b><i>ARHGEF9</i></b>  | chrX:63755062-63756421      | ENST00000624538.1    | ENSG00000131089.15 | repressed    |
| <b><i>BRINP1</i></b>   | chr9:119369375-119370353    | ENST00000373964.2    | ENSG00000078725.12 | repressed    |
| <b><i>MED30</i></b>    | chr8:117519681-117520764    | ENST00000297347.7    | ENSG00000164758.7  | escaper      |
| <b><i>TMEM106B</i></b> | chr7:12210274-12211294      | ENST00000442107.1    | ENSG00000106460.18 | escaper      |
| <b><i>ZNF300</i></b>   | chr5:150904928-150906439    | ENST00000394226.2    | ENSG00000145908.12 | escaper      |
| <b><i>PGK</i></b>      | chrX:78103813-78104327      | ENST00000373316.4    | ENSG00000102144.13 | iLAD         |
