# Supplementary material for: Promoter-Intrinsic and Local Chromatin Features Determine Gene Repression in LADs
Source: PubMed Central journal article supplement — Cell. 2019 May 2;177(4):852–864.e14. doi: 10.1016/j.cell.2019.03.009 (PMC6506275; doi:10.1016/j.cell.2019.03.009), 2019-05-02
Supplement: mmc2.pdf [file mmc2.pdf]

**Table S2. ChIP-seq datasets used. Related to Figure 2, 5 and 6.**

| Target     | source                          | PMID     | year | Samples                   | Input                                                            |
|------------|---------------------------------|----------|------|---------------------------|------------------------------------------------------------------|
| H3K9me2    | Salzberg <i>et al.</i> , 2017   | 28301528 | 2017 | GSM1846169,<br>GSM2152591 | GSM1846175                                                       |
| H3K9me3    | Salzberg <i>et al.</i> , 2017   | 28301528 | 2017 | GSM1846192                | GSM1846175                                                       |
| POLR2A     | ENCODE: ENCSR388QZF             | 22955616 | 2016 | GSM2423412,<br>GSM2423413 | GSM2423120, GSM2423121                                           |
| POLR2A     | ENCODE: ENCSR031TFS             | 22955616 | 2016 | GSM2422913,<br>GSM2422914 | GSM2423120, GSM2423121                                           |
| POL2AS2    | ENCODE: ENCSR000EGF             | 22955616 | 2012 | GSM935402                 | GSM935618                                                        |
| c-Myc      | ENCODE: ENCSR000EGJ             | 22955616 | 2012 | GSM935516                 | GSM935618                                                        |
| Brd4       | Tyler <i>et al.</i> 2017        | 28619718 | 2017 | GSM2345029,<br>GSM2345030 | GSM2345031, GSM2345032                                           |
| NELFe      | ENCODE: ENCSR000DOF             | 22955616 | 2011 | GSM935392                 | GSM935363                                                        |
| ENL        | ENCODE: ENCSR675LRO             | 22955616 | 2016 | GSM2423844,<br>GSM2423845 | GSM2423120, GSM2423121                                           |
| LARP7      | ENCODE: ENCSR288MOZ             | 22955616 | 2016 | GSM2423264,<br>GSM2423265 | GSM2423120, GSM2423121                                           |
| GTF2F1     | ENCODE: ENCSR189VXS             | 22955616 | 2017 | ENCSR189VXS               | ENCSR658AGP                                                      |
| H3K9me2    | Liu <i>et al.</i> , 2018        | 29211708 | 2018 | GSM2509499,<br>GSM2509500 | GSM2509507, GSM2509508                                           |
| H3K9me3    | Liu <i>et al.</i> , 2018        | 29211708 | 2018 | GSM2509487,<br>GSM2509488 | GSM2509493, GSM2509494                                           |
| H3K36me3   | ENCODE: ENCSR000DWB             | 22955616 | 2011 | GSM945302                 | GSM945294                                                        |
| H3K27me3   | van den Boom <i>et al.</i> 2016 | 26748712 | 2016 | GSM1319307                | GSM1319306                                                       |
| H3K27me3   | Schmidl <i>et al.</i> , 2015    | 26280331 | 2015 | GSM1782749,<br>GSM1782750 | GSM1782728, GSM1782729,<br>GSM1782730, GSM1782731,<br>GSM1782732 |
| H3K27me3   | Schmidl <i>et al.</i> , 2015    | 26280331 | 2015 | GSM1782739,<br>GSM1782740 | GSM1782708, GSM1782709,<br>GSM1782710                            |
| H3K27ac    | Schmidl <i>et al.</i> , 2015    | 26280331 | 2015 | GSM1782721,<br>GSM1782722 | GSM1782728, GSM1782729,<br>GSM1782730, GSM1782731,<br>GSM1782732 |
| H3K27ac    | Schmidl <i>et al.</i> , 2015    | 26280331 | 2015 | GSM1782704                | GSM1782708, GSM1782709,<br>GSM1782710                            |
| H3K4me1    | Schmidl <i>et al.</i> , 2015    | 26280331 | 2015 | GSM1782725,<br>GSM1782726 | GSM1782728, GSM1782729,<br>GSM1782730, GSM1782731,<br>GSM1782732 |
| H3K4me1    | Schmidl <i>et al.</i> , 2015    | 26280331 | 2015 | GSM1782706,<br>GSM1782707 | GSM1782708, GSM1782709,<br>GSM1782710                            |
| H3K36me3   | Schmidl <i>et al.</i> , 2015    | 26280331 | 2015 | GSM1782723,<br>GSM1782724 | GSM1782728, GSM1782729,<br>GSM1782730, GSM1782731,<br>GSM1782732 |
| H3K36me3   | Schmidl <i>et al.</i> , 2015    | 26280331 | 2015 | GSM1782705                | GSM1782708, GSM1782709,<br>GSM1782710                            |
| H3K4me1    | Pradeepa <i>et al.</i> , 2016   | 27089178 | 2016 | GSM2054697                | GSM2054698                                                       |
| H3K27ac    | Pradeepa <i>et al.</i> , 2016   | 27089178 | 2016 | GSM2054696                | GSM2054698                                                       |
| H3K122ac   | Pradeepa <i>et al.</i> , 2016   | 27089178 | 2016 | GSM2054695                | GSM2054698                                                       |
| macroH2A.1 | Ratnakumar <i>et al.</i> , 2012 | 22391447 | 2012 | GSM866351                 | GSM866352                                                        |
| H3K79me2   | Fu <i>et al.</i> , 2013         | 23754963 | 2013 | GSM865283                 | GSM865284                                                        |
| H3K79me2   | ENCODE: ENCSR000APD             | 22955616 | 2011 | GSM733653                 | GSM733780, GSM2527338,<br>GSM2527339                             |
| H3K9me3    | ENCODE: ENCSR000APE             | 22955616 | 2011 | GSM733776                 | GSM733780, GSM2527338,<br>GSM2527339                             |
| H2AFZ      | ENCODE: ENCSR000APC             | 22955616 | 2011 | GSM733786                 | GSM733780, GSM2527338,<br>GSM2527339                             |
| H4K5acK8ac | Minoda <i>et al.</i> , 2018     | 30080437 | 2018 | GSM3110542,<br>GSM3110543 | GSM3110544                                                       |
